# Supplementary material for: Can models of self-management support be adapted across cancer types? A comparison of unmet self-management needs for patients with breast or colorectal cancer
Source: Springer Nature journal article supplement (doi:10.1007/s00520-017-3896-0), 2017-09-22
Supplement: MOESM1 [file 15081012]

**Supplementary Material**

A “chronic disease” is an illness or a health condition that lasts for a long time or for your life time. Asthma, cancer, cardiovascular disease, chronic obstructive pulmonary disease, diabetes, and stroke are all chronic diseases. Chronic conditions can affect many aspects of a person’s life and often need ongoing management. This survey asks about your care needs, and how well they have been met. For every item, please shade the bubble which best describes how much help you needed with the issue in the last month, as a result of your cancer.

There are 4 possible answers to choose from:

**1** This was not a problem for me or I didn’t need help

**2** This was a problem for me, but I got the help I needed

**3** This was a problem for me, and I needed a little more help

**4** This was a problem for me, and I needed a lot more help

**Please complete all of the following questions**

| **In the last month, what was your need for help with...** | **Not a problem, or didn’t need help** | **A problem, but got the help I needed** | **A problem, and needed a little more help** | **A problem and needed a lot more help** |
| --- | --- | --- | --- | --- |
| Taking your medications | 1 | 2 | 3 | 4 |
| Knowing how to take care of symptoms or side effects at home | 1 | 2 | 3 | 4 |
| Recognising symptoms that need medical attention | 1 | 2 | 3 | 4 |
| Knowing which healthcare provider to contact for specific problems or questions | 1 | 2 | 3 | 4 |
| Getting medical supplies or aids to use at home | 1 | 2 | 3 | 4 |
| Information about what you can do to keep as well as possible | 1 | 2 | 3 | 4 |
| Improving your diet | 1 | 2 | 3 | 4 |
| Exercising more | 1 | 2 | 3 | 4 |
| Quitting smoking | 1 | 2 | 3 | 4 |
| Drinking less alcohol | 1 | 2 | 3 | 4 |
| Accessing complementary therapies e.g. massage, acupuncture | 1 | 2 | 3 | 4 |
